# Supplementary material
Source: MDPI journal article supplement (https://www.mdpi.com/2073-4433/7/4/59)
Supplement: s1 [file s1]

## Comments on the revised manuscript

The manuscript has been much improved as a whole; however, there are still missing important points in the equations.

1. There is no buoyancy (gravity) force term in eq. (2). Is it right? If so, the authors did not consider the buoyancy effect by the difference of air density due to heat and moisture.
2. The definitions of  $K$ ,  $D$ , and  $\mu$  are missing.
3. Definition of  $M$  in eq. (6) is missing. Is  $M$  specific humidity or absolute humidity?
4. Definition and value of  $S_{ct}$  in eq. (10) is missing.
5. Definitions of  $g_i$ ,  $\beta$  and  $\sigma_t$  are missing in eq. (12).
6. How was density  $\rho$  calculated? Is  $\rho$  constant or not?
